# Supplementary material for: Immobilization of lysozyme proteins on a hierarchical zeolitic imidazolate framework (ZIF-8)
Source: Royal Society of Chemistry journal article supplement (doi:10.1039/c6dt04582k), 2017-01-01
Supplement: c6dt04582k1.pdf [file c6dt04582k1.pdf]

## Supplementary information

### Immobilization of lysozyme proteins on a hierarchical zeolitic imidazolate framework (ZIF-8)

Gen Liu†, Yan Xu†, Yide Han, Junbiao Wu, Junli Xu, Hao Meng, and Xia Zhang\*

Department of Chemistry, College of Sciences, Northeastern University, Liaoning, Shenyang 110819, China

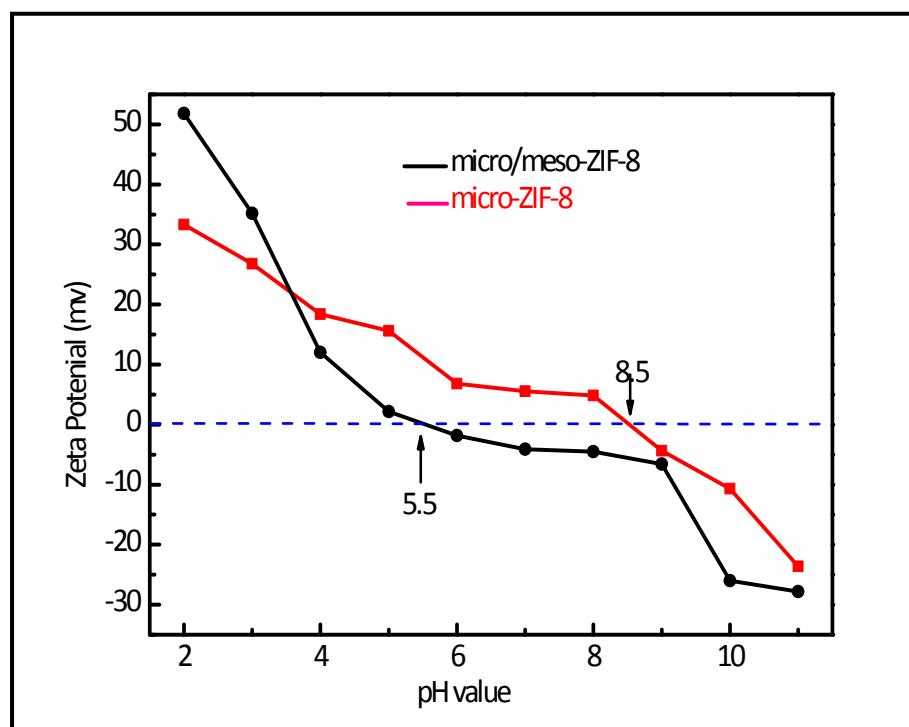

Fig. S1 Surface zeta potential versus different pH values of micro/meso-ZIF-8 and meso-ZIF-8

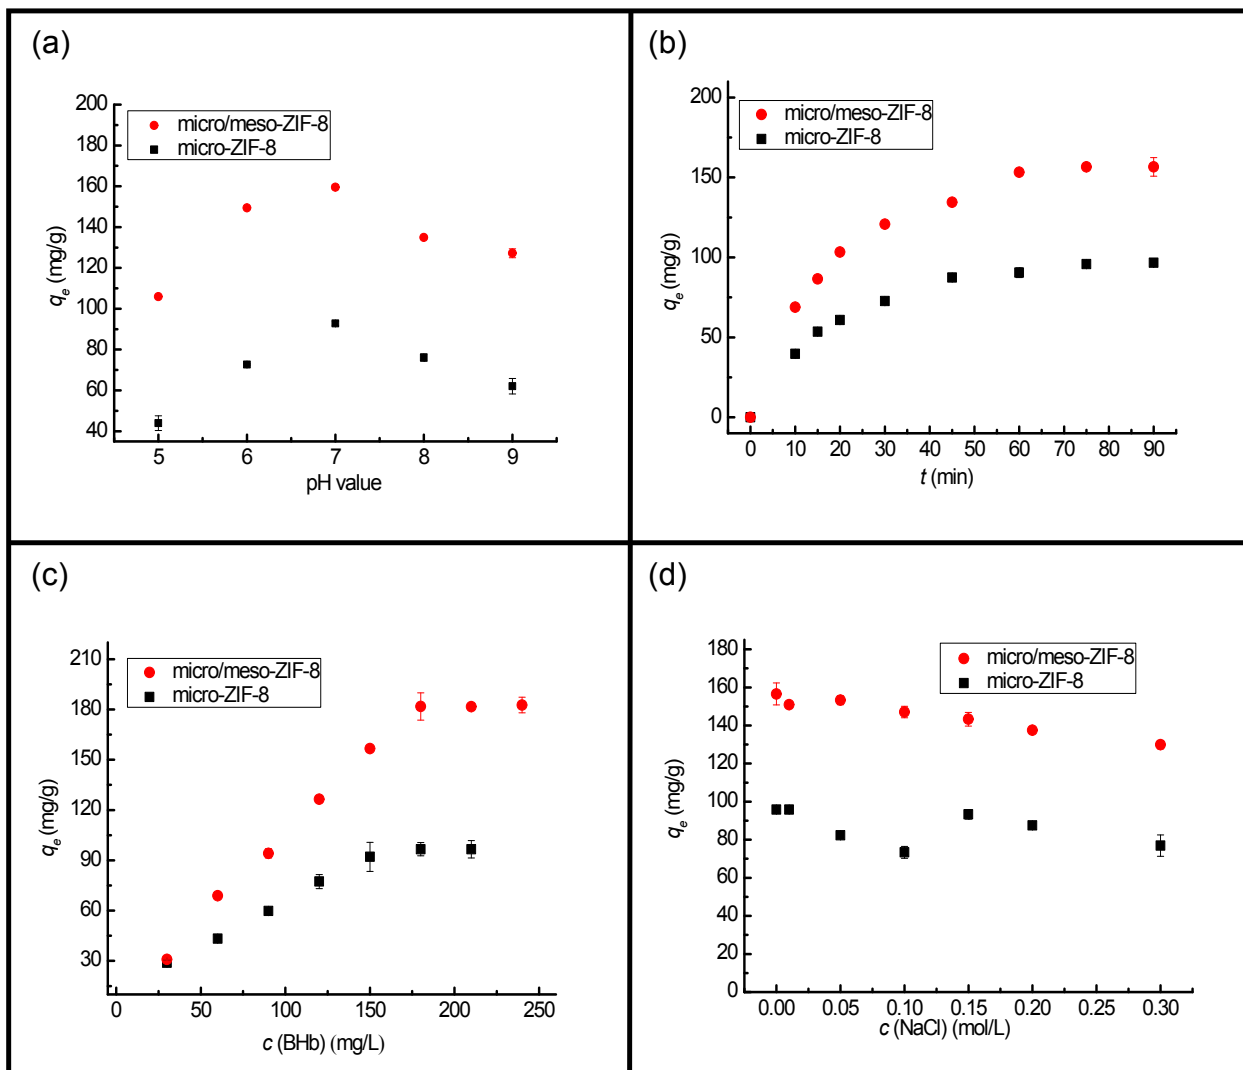

Fig. S2 The batch adsorption tests of BHb on both ZIF-8 adsorbents under different conditions. (a) The adsorption capacity versus different pH values, adsorption conditions:  $c$ (BHb)= 150 mg/L,  $t$ =90min; (b) Adsorption kinetics, adsorption conditions:  $c$ (BHb)= 150 mg/L, pH=7; (c) Adsorption isotherms, adsorption conditions: pH=7,  $t$ =90min; (d) The effect of ionic strength, adsorption conditions:  $c$ (BHb)= 150 mg/L,  $t$ =90min, pH=7.

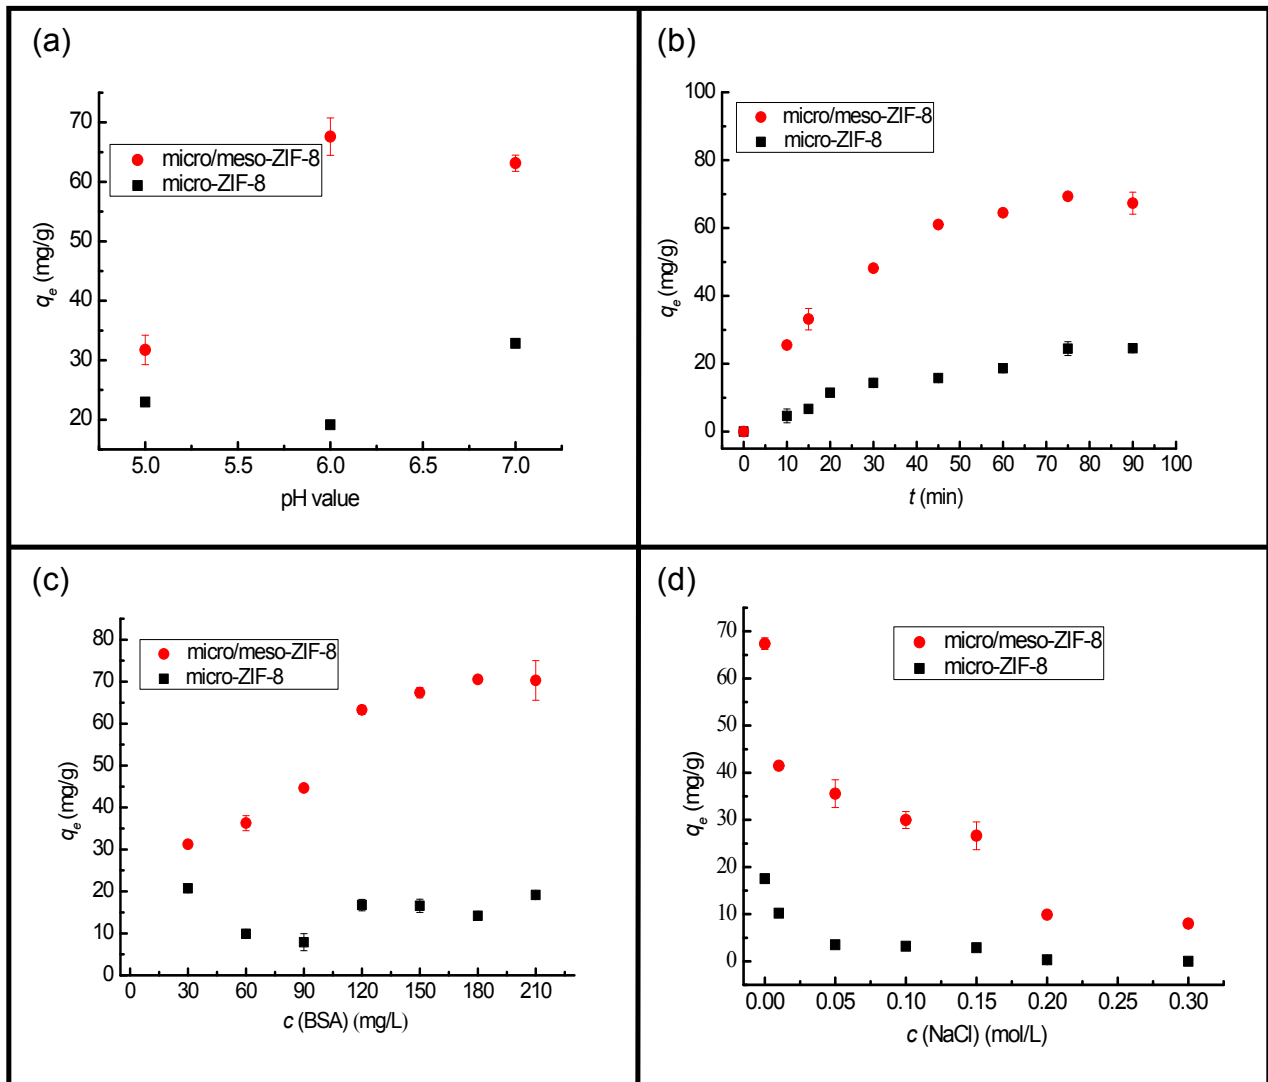

Fig. S3 The batch adsorption tests of BSA on both ZIF-8 adsorbents under different conditions. (a) The adsorption capacity versus different pH values, adsorption conditions:  $c(\text{BSA})= 150 \text{ mg/L}$ ,  $t=90\text{min}$ ; (b) Adsorption kinetics, adsorption conditions:  $c(\text{BSA})= 150 \text{ mg/L}$ ,  $\text{pH}=6$ ; (c) Adsorption isotherms, adsorption conditions:  $\text{pH}=6$ ,  $t=90\text{min}$ ; (d) The effect of ionic strength, adsorption conditions:  $c(\text{BSA})= 150 \text{ mg/L}$ ,  $\text{pH}=6$ ,  $t=90\text{min}$ .

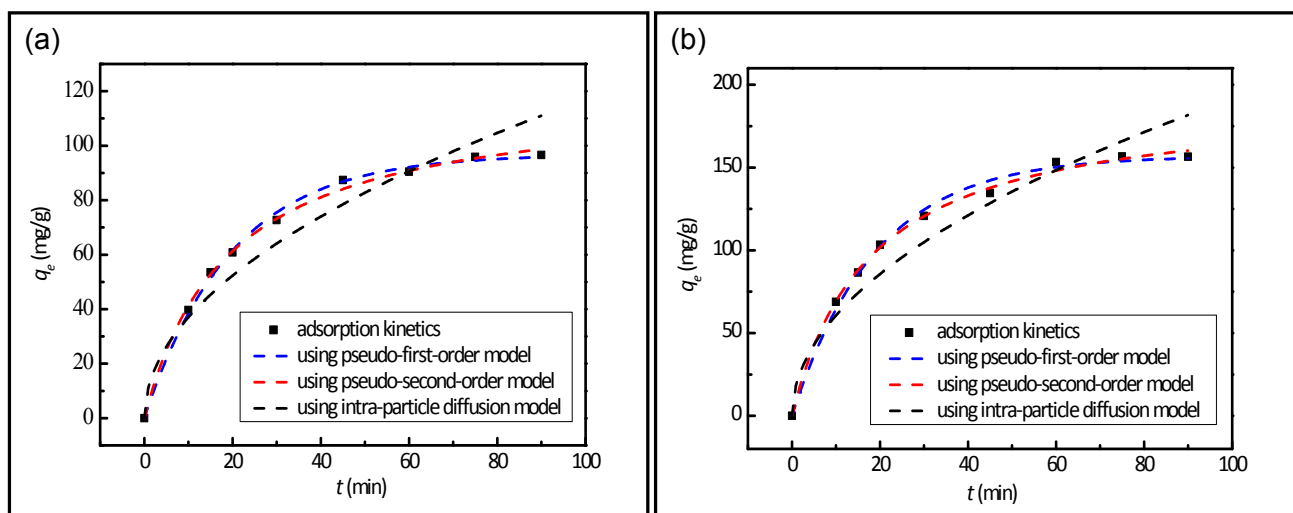

Fig. S4 The fitting curves of the adsorption kinetic data of BHB on micro-ZIF-8 (a) and micro/meso-ZIF-8 (b) using the kinetics models.

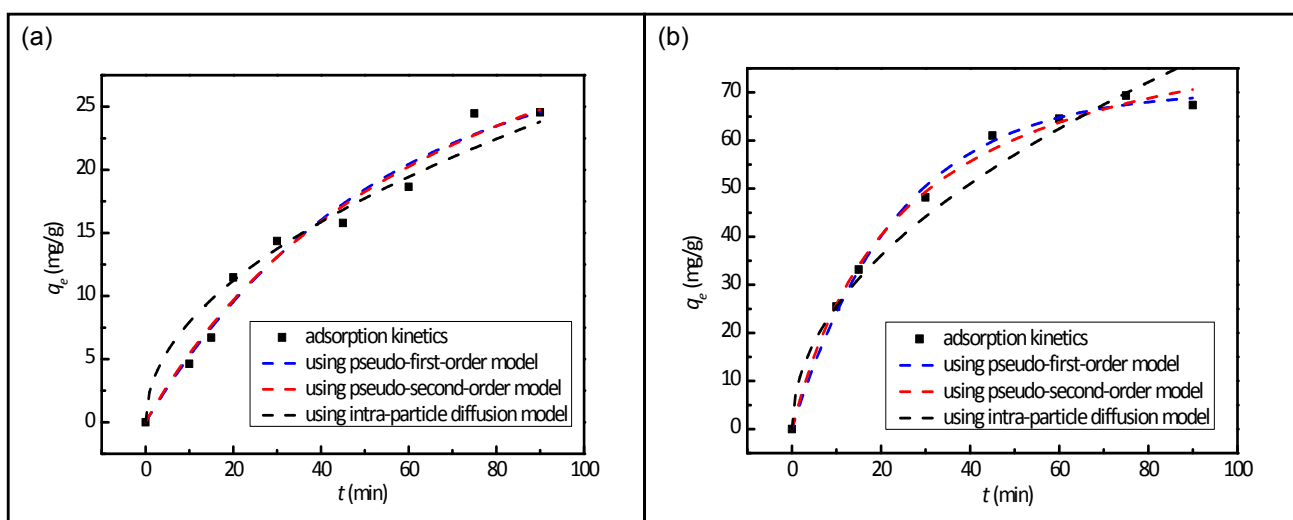

Fig. S5 The fitting curves of the adsorption kinetic data of BSA on micro-ZIF-8 (a) and micro/meso-ZIF-8 (b) using the kinetics models.

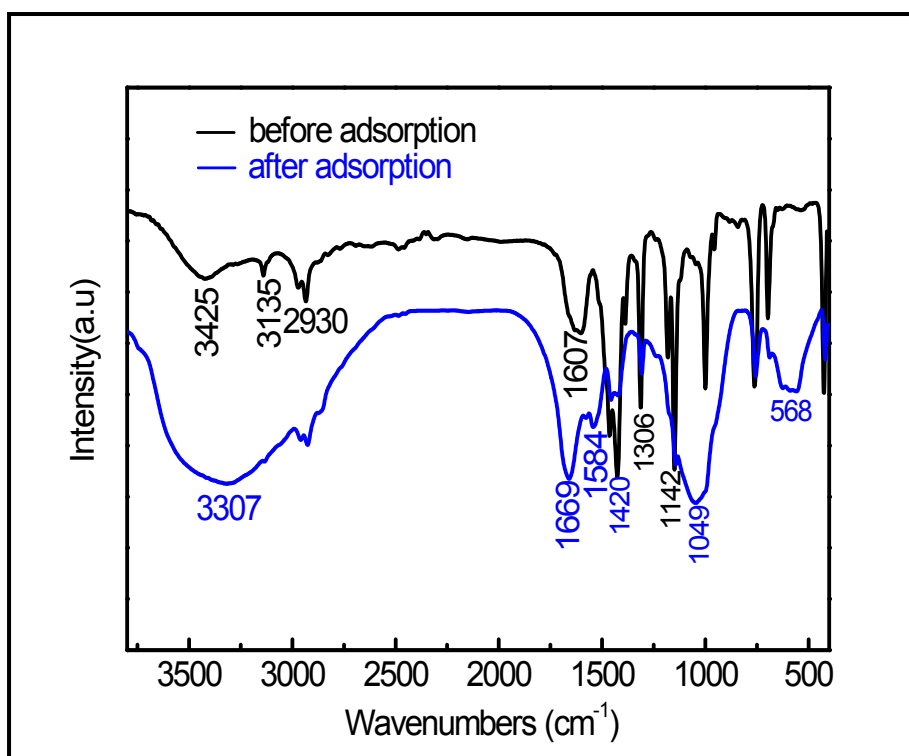

Fig. S6 FT-IR spectra of micro/meso-ZIF-8 before and after LZM adsorption

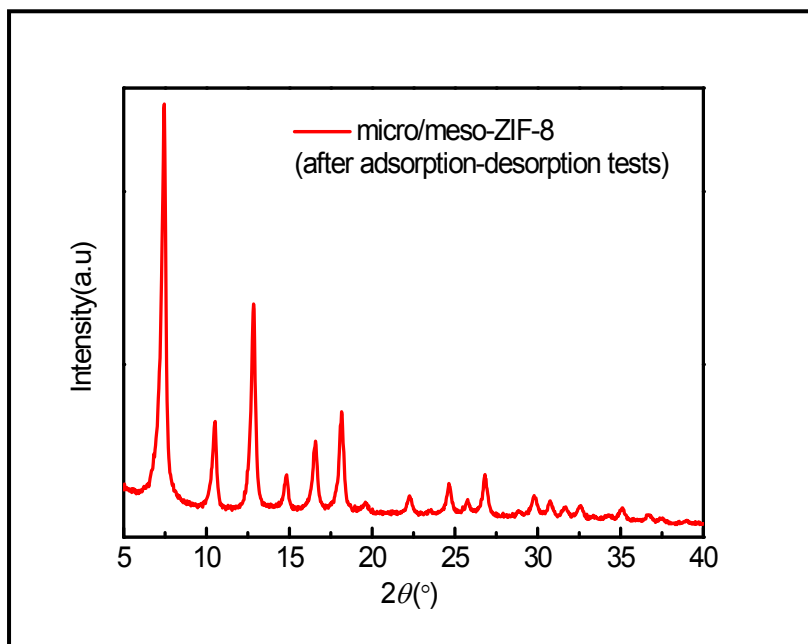

Fig. S7 XRD pattern of micro/meso-ZIF-8 MOFs after adsorption-desorption tests
